# Supplementary material for: Habitat partitioning among sympatric tinamous in semiarid woodlands of central Argentina
Source: PLOS journal article supplement (doi:10.1371/journal.pone.0297053), 2024-01-19
Supplement: S5 (10.1371/journal.pone.0297053.s005) [file journal.pone.0297053.s005]

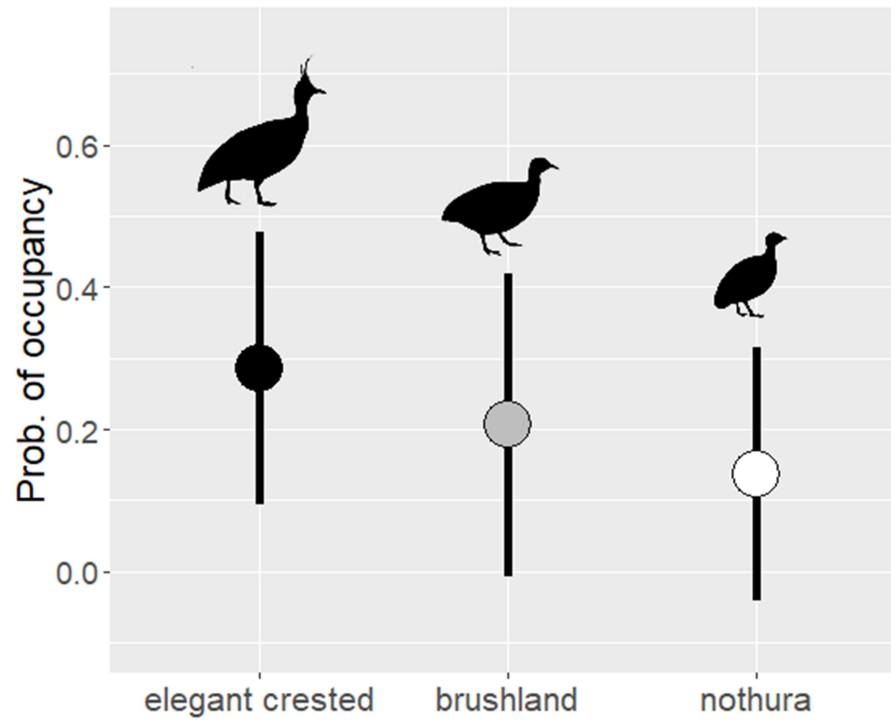

**S1 Fig. Probability of occupancy ( $\pm$  SD) for three tinamou species in caldén woodlands in central Argentina.** Elegant crested tinamous (*Eudromia elegans*; black), brushland tinamous (*Nothoprocta cinerascens*; grey), and nothura tinamous (*Nothura* spp.; white).
